# Supplementary material for: Reduced Stroke Volume and Brain Perfusion Drive Postural Hyperventilation in Postural Orthostatic Tachycardia Syndrome
Source: PubMed Central journal article supplement — JACC Basic Transl Sci. 2024 Jun 26;9(8):939–53. doi: 10.1016/j.jacbts.2024.04.011 (PMC11405806; doi:10.1016/j.jacbts.2024.04.011), 2024-06-26
Supplement: mmc1.pdf [file mmc1.pdf]

**Supplemental Table 1.** Cardiorespiratory and sympathetic parameters at rest and during head-up tilt in female patients on vs off medications.

|                                                         | <b>Off Medication<br/>(n=14)</b> | <b>On Medication<br/>(n=11)</b> | <b>P Value</b> |
|---------------------------------------------------------|----------------------------------|---------------------------------|----------------|
| <b><u>BASELINE</u></b>                                  |                                  |                                 |                |
| <b><u>Peripheral Hemodynamics</u></b>                   |                                  |                                 |                |
| Heart rate (bpm)                                        | 77 ± 11                          | 63 ± 10                         | <b>0.002</b>   |
| Stroke volume (mL)                                      | 77 ± 18                          | 82 ± 9                          | 0.36           |
| Cardiac output (L/min)                                  | 5.9 ± 1.2                        | 5.2 ± 0.9                       | 0.10           |
| Mean arterial pressure (mmHg)                           | 92 ± 15                          | 91 ± 12                         | 0.89           |
| Systemic vascular resistance (dynes/cm <sup>5</sup> )   | 1669 ± 555                       | 1674 ± 586                      | 0.98           |
| Pulse pressure (mmHg)                                   | 62.1 ± 12.3                      | 63.8 ± 8.6                      | 0.71           |
| Arterial pulsatility index                              | 0.68 ± 0.12                      | 0.70 ± 0.07                     | 0.62           |
| <b><u>Cerebral Hemodynamics</u></b>                     |                                  |                                 |                |
| MCAv <sub>mean</sub> (cm/s)                             | 77 ± 15                          | 78 ± 10                         | 0.93           |
| MCAv <sub>peak</sub> (cm/s)                             | 112 ± 21                         | 116 ± 14                        | 0.62           |
| MCAv <sub>min</sub> (cm/s)                              | 60 ± 13                          | 59 ± 8                          | 0.80           |
| MCAv pulsatility index                                  | 0.68 ± 0.1                       | 0.73 ± 0.1                      | 0.18           |
| <b><u>Sympathetic</u></b>                               |                                  |                                 |                |
|                                                         | <b>(n=6)</b>                     | <b>(n=6)</b>                    |                |
| Burst frequency (bursts/min)                            | 14 ± 4                           | 11 ± 6                          | 0.34           |
| Burst amplitude (% of peak)                             | 40 ± 12                          | 43 ± 17                         | 0.74           |
| Total MSNA (a.u./min)                                   | 583 ± 312                        | 550 ± 356                       | 0.87           |
| <b><u>Respiratory</u></b>                               |                                  |                                 |                |
| Ventilation (L/min)                                     | 8.8 ± 2.5                        | 9.7 ± 2.8                       | 0.40           |
| End tidal CO <sub>2</sub> (mmHg)                        | 38 ± 4                           | 38 ± 3                          | 0.93           |
| End tidal O <sub>2</sub> (mmHg)                         | 92 ± 7                           | 93 ± 7                          | 0.53           |
| <b><u>Δ HEAD-UP TILT</u></b>                            |                                  |                                 |                |
| <b><u>Peripheral Hemodynamics</u></b>                   |                                  |                                 |                |
| Δ Heart rate (bpm)                                      | 21 ± 9                           | 19 ± 9                          | 0.56           |
| Δ Stroke volume (mL)                                    | -26 ± 8                          | -25 ± 7                         | 0.79           |
| Δ Cardiac output (L/min)                                | -0.9 ± 0.6                       | -0.5 ± 0.6                      | 0.09           |
| Δ Mean arterial pressure (mmHg)                         | 7 ± 10                           | 10 ± 10                         | 0.44           |
| Δ Systemic vascular resistance (dynes/cm <sup>5</sup> ) | 496 ± 399                        | 334 ± 358                       | 0.30           |
| Δ Pulse pressure (mmHg)                                 | -6.1 ± 4.3                       | -2.1 ± 6.5                      | 0.07           |
| Δ Arterial pulsatility index                            | -0.1 ± 0.05                      | -0.1 ± 0.02                     | 0.25           |
| <b><u>Cerebral Hemodynamics</u></b>                     |                                  |                                 |                |
| Δ MCAv <sub>mean</sub> (cm/s)                           | 1 ± 6                            | 0.3 ± 6                         | 0.80           |
| Δ MCAv <sub>peak</sub> (cm/s)                           | -4 ± 8                           | -5 ± 8                          | 0.76           |

|                                                                                                                                                                                                                                                                                                                                            |              |              |      |
|--------------------------------------------------------------------------------------------------------------------------------------------------------------------------------------------------------------------------------------------------------------------------------------------------------------------------------------------|--------------|--------------|------|
| $\Delta$ MCAv <sub>min</sub> (cm/s)                                                                                                                                                                                                                                                                                                        | 3 ± 5        | 3 ± 6        | 0.84 |
| $\Delta$ MCAv pulsatility index                                                                                                                                                                                                                                                                                                            | -0.1 ± 0.06  | -0.1 ± 0.04  | 0.97 |
|                                                                                                                                                                                                                                                                                                                                            |              |              |      |
| <b><u>Sympathetic</u></b>                                                                                                                                                                                                                                                                                                                  | <b>(n=5)</b> | <b>(n=4)</b> |      |
| Burst frequency (bursts/min)                                                                                                                                                                                                                                                                                                               | 23 ± 12      | 18 ± 11      | 0.53 |
| Burst amplitude<br>(% of peak)                                                                                                                                                                                                                                                                                                             | 38 ± 17      | 36 ± 13      | 0.82 |
| Total MSNA (a.u./min)                                                                                                                                                                                                                                                                                                                      | 2642 ± 2293  | 1562 ± 944   | 0.41 |
|                                                                                                                                                                                                                                                                                                                                            |              |              |      |
| <b><u>Respiratory</u></b>                                                                                                                                                                                                                                                                                                                  |              |              |      |
| $\Delta$ Ventilation (L/min)                                                                                                                                                                                                                                                                                                               | 2.9 ± 2.0    | 4.0 ± 2.7    | 0.26 |
| $\Delta$ End tidal CO <sub>2</sub> (mmHg)                                                                                                                                                                                                                                                                                                  | -0.1 ± 0.4   | -0.1 ± 0.2   | 0.67 |
| $\Delta$ End tidal O <sub>2</sub> (mmHg)                                                                                                                                                                                                                                                                                                   | 0.1 ± 1.6    | 0.03 ± 0.6   | 0.85 |
| Data are reported as mean ± standard deviation. Group differences were compared using an independent samples two-tailed t-test. Abbr: POTS, Postural Orthostatic Tachycardia Syndrome; MCAv, middle cerebral artery velocity; MSNA, muscle sympathetic nerve activity; a.u., arbitrary units; CO, carbon dioxide; O <sub>2</sub> , oxygen. |              |              |      |

**Supplemental Table 2.** Cardiorespiratory responses to hyperoxia during HUT in HC (n=11).

|                                                                                                                                                                                                                                                                                                                                                                                                                                                                                                                                                                                                                                                        | Normoxia    | Hyperoxia                    |                              |                              |                              |                              |                              |
|--------------------------------------------------------------------------------------------------------------------------------------------------------------------------------------------------------------------------------------------------------------------------------------------------------------------------------------------------------------------------------------------------------------------------------------------------------------------------------------------------------------------------------------------------------------------------------------------------------------------------------------------------------|-------------|------------------------------|------------------------------|------------------------------|------------------------------|------------------------------|------------------------------|
|                                                                                                                                                                                                                                                                                                                                                                                                                                                                                                                                                                                                                                                        | Baseline    | 0-5 sec                      | 6-10 sec                     | 11-15 sec                    | 16-20 sec                    | 21-25 sec                    | 26-30 sec                    |
| <b>Respiratory</b>                                                                                                                                                                                                                                                                                                                                                                                                                                                                                                                                                                                                                                     |             |                              |                              |                              |                              |                              |                              |
| $V_E$<br>(L/min)                                                                                                                                                                                                                                                                                                                                                                                                                                                                                                                                                                                                                                       | 12.9<br>2.4 | 13.8<br>2.7                  | 13.3<br>2.3                  | 12.4<br>2.3                  | <b>11.9*</b><br><b>2.2</b>   | <b>11.7‡</b><br><b>2.3</b>   | <b>11.5‡</b><br><b>2.1</b>   |
| ETCO <sub>2</sub><br>(mmHg)                                                                                                                                                                                                                                                                                                                                                                                                                                                                                                                                                                                                                            | 39.6<br>3.2 | 39.6<br>3.2                  | 39.4<br>3.2                  | 39.2<br>3.1                  | 39.0<br>2.9                  | 39.0<br>2.9                  | 39.0<br>2.9                  |
| ETO <sub>2</sub><br>(mmHg)                                                                                                                                                                                                                                                                                                                                                                                                                                                                                                                                                                                                                             | 92.3<br>5.6 | <b>127.6†</b><br><b>15.6</b> | <b>234.4†</b><br><b>27.0</b> | <b>293.8†</b><br><b>27.2</b> | <b>334.7†</b><br><b>24.9</b> | <b>363.5†</b><br><b>19.6</b> | <b>380.9†</b><br><b>15.4</b> |
| <b>Cardiovascular</b>                                                                                                                                                                                                                                                                                                                                                                                                                                                                                                                                                                                                                                  |             |                              |                              |                              |                              |                              |                              |
| MAP<br>(mmHg)                                                                                                                                                                                                                                                                                                                                                                                                                                                                                                                                                                                                                                          | 101<br>13   | 100<br>12                    | 100<br>13                    | 99<br>13                     | 98<br>11                     | <b>98‡</b><br><b>12</b>      | 98<br>13                     |
| CO<br>(L/min)                                                                                                                                                                                                                                                                                                                                                                                                                                                                                                                                                                                                                                          | 5.1<br>1.1  | 5.1<br>1.1                   | 5.1<br>1.1                   | 5.0<br>1.1                   | 5.1<br>1.1                   | 5.0<br>1.1                   | 5.0<br>1.1                   |
| HR<br>(bpm)                                                                                                                                                                                                                                                                                                                                                                                                                                                                                                                                                                                                                                            | 85<br>13    | 86<br>15                     | 85<br>14                     | 85<br>14                     | 84<br>14                     | 85<br>13                     | 83<br>14                     |
| SV<br>(mL)                                                                                                                                                                                                                                                                                                                                                                                                                                                                                                                                                                                                                                             | 60<br>14    | 59<br>14                     | 60<br>14                     | 60<br>14                     | 60<br>14                     | 60<br>14                     | 60<br>14                     |
| SVR<br>(dynes/cm <sup>5</sup> )                                                                                                                                                                                                                                                                                                                                                                                                                                                                                                                                                                                                                        | 1692<br>604 | 1678<br>609                  | 1677<br>612                  | 1687<br>638                  | 1657<br>529                  | 1672<br>603                  | 1697<br>619                  |
| Data are reported as mean ± standard deviation (below). Cardiorespiratory responses to hyperoxia were compared using a 2-factor mixed-effects model: [Group: Control vs. Patient] x [Gas (repeated measure): Normoxia vs Hyperoxia] and Bonferroni post-hoc analysis. *p<0.05; ‡p<0.01; †p<0.001 represent values significantly different from normoxic baseline. Abbr: HC, healthy controls; HUT, head-up tilt; $V_E$ , minute ventilation; ETCO <sub>2</sub> , end-tidal carbon dioxide; ETO <sub>2</sub> , end-tidal oxygen; MAP, mean arterial pressure; CO, cardiac output; HR, heart rate; SV, stroke volume; SVR, systemic vascular resistance. |             |                              |                              |                              |                              |                              |                              |

**Supplemental Table 3.** Cardiorespiratory responses to hyperoxia during HUT in patients with POTS (n=23)

|                                                                                                                                                                                                                                                                                                                                                                                                                                                                                                                                                                                                                                                                                                       | <u>Normoxia</u> | <u>Hyperoxia</u>             |                              |                              |                              |                              |                              |
|-------------------------------------------------------------------------------------------------------------------------------------------------------------------------------------------------------------------------------------------------------------------------------------------------------------------------------------------------------------------------------------------------------------------------------------------------------------------------------------------------------------------------------------------------------------------------------------------------------------------------------------------------------------------------------------------------------|-----------------|------------------------------|------------------------------|------------------------------|------------------------------|------------------------------|------------------------------|
|                                                                                                                                                                                                                                                                                                                                                                                                                                                                                                                                                                                                                                                                                                       | <b>Baseline</b> | <b>0-5 sec</b>               | <b>6-10 sec</b>              | <b>11-15 sec</b>             | <b>16-20 sec</b>             | <b>21-25 sec</b>             | <b>26-30 sec</b>             |
| <b><u>Respiratory</u></b>                                                                                                                                                                                                                                                                                                                                                                                                                                                                                                                                                                                                                                                                             |                 |                              |                              |                              |                              |                              |                              |
| V <sub>E</sub><br>(L/min)                                                                                                                                                                                                                                                                                                                                                                                                                                                                                                                                                                                                                                                                             | 15.1<br>4.2     | 16.5<br>5.0                  | 16.1<br>5.0                  | 15.3<br>5.1                  | 15.2<br>5.8                  | 14.7<br>5.0                  | <b>14.1‡</b><br><b>4.2</b>   |
| ETCO <sub>2</sub><br>(mmHg)                                                                                                                                                                                                                                                                                                                                                                                                                                                                                                                                                                                                                                                                           | 37.6<br>3.7     | 37.7<br>3.7                  | 37.5<br>3.6                  | 37.4<br>3.6                  | 37.3<br>3.6                  | 37.3<br>3.6                  | 37.3<br>3.6                  |
| ETO <sub>2</sub><br>(mmHg)                                                                                                                                                                                                                                                                                                                                                                                                                                                                                                                                                                                                                                                                            | 93.7<br>7.7     | <b>127.7†</b><br><b>16.1</b> | <b>237.8†</b><br><b>34.7</b> | <b>298.1†</b><br><b>41.5</b> | <b>337.9†</b><br><b>42.6</b> | <b>365.6†</b><br><b>41.9</b> | <b>381.3†</b><br><b>41.9</b> |
| <b><u>Cardiovascular</u></b>                                                                                                                                                                                                                                                                                                                                                                                                                                                                                                                                                                                                                                                                          |                 |                              |                              |                              |                              |                              |                              |
| MAP<br>(mmHg)                                                                                                                                                                                                                                                                                                                                                                                                                                                                                                                                                                                                                                                                                         | 101<br>17       | 101<br>17                    | 100<br>18                    | 100<br>17                    | <b>98†</b><br><b>17</b>      | <b>99*</b><br><b>18</b>      | <b>98†</b><br><b>17</b>      |
| CO<br>(L/min)                                                                                                                                                                                                                                                                                                                                                                                                                                                                                                                                                                                                                                                                                         | 5.3<br>1.0      | 5.3<br>1.0                   | 5.4<br>0.9                   | 5.3<br>0.9                   | 5.3<br>1.0                   | <b>5.2*</b><br><b>0.9</b>    | 5.2<br>0.9                   |
| HR<br>(bpm)                                                                                                                                                                                                                                                                                                                                                                                                                                                                                                                                                                                                                                                                                           | 97<br>16        | 98<br>18                     | 97<br>17                     | 96<br>18                     | 96<br>18                     | 95<br>18                     | 96<br>18                     |
| SV<br>(mL)                                                                                                                                                                                                                                                                                                                                                                                                                                                                                                                                                                                                                                                                                            | 55<br>12        | 54<br>11                     | 55<br>12                     | 55<br>12                     | 55<br>12                     | 55<br>12                     | 55<br>12                     |
| SVR<br>(dynes/cm <sup>5</sup> )                                                                                                                                                                                                                                                                                                                                                                                                                                                                                                                                                                                                                                                                       | 1601<br>532     | 1598<br>530                  | 1573<br>503                  | 1587<br>527                  | <b>1565*</b><br><b>524</b>   | 1601<br>524                  | 1582<br>526                  |
| <p>Data are reported as mean ± standard deviation (below). Cardiorespiratory responses to hyperoxia were compared using a 2-factor mixed-effects model: [Group: Control vs. Patient] x [Gas (repeated measure): Normoxia vs Hyperoxia]] and Bonferroni post-hoc analysis. *p&lt;0.05; ‡p&lt;0.01; †p&lt;0.001 represent values significantly different from normoxic baseline. Abbr: POTS, postural orthostatic tachycardia syndrome; HUT, head-up tilt; V<sub>E</sub>, minute ventilation; ETCO<sub>2</sub>; end-tidal carbon dioxide; ETO<sub>2</sub>, end-tidal oxygen; MAP, mean arterial pressure; CO, cardiac output; HR, heart rate; SV, stroke volume; SVR, systemic vascular resistance.</p> |                 |                              |                              |                              |                              |                              |                              |

**Supplemental Table 4.** Supine cardiorespiratory responses to hyperoxia in HC (n=11)

|                                                                                                                                                                                                                                                                                                                                                                                                                                                                                                                                                                                                                                                         | <u>Normoxia</u> | <u>Hyperoxia</u>             |                              |                              |                              |                              |                              |
|---------------------------------------------------------------------------------------------------------------------------------------------------------------------------------------------------------------------------------------------------------------------------------------------------------------------------------------------------------------------------------------------------------------------------------------------------------------------------------------------------------------------------------------------------------------------------------------------------------------------------------------------------------|-----------------|------------------------------|------------------------------|------------------------------|------------------------------|------------------------------|------------------------------|
|                                                                                                                                                                                                                                                                                                                                                                                                                                                                                                                                                                                                                                                         | <b>Baseline</b> | <b>0-5 sec</b>               | <b>6-10 sec</b>              | <b>11-15 sec</b>             | <b>16-20 sec</b>             | <b>21-25 sec</b>             | <b>26-30 sec</b>             |
| <b><u>Respiratory</u></b>                                                                                                                                                                                                                                                                                                                                                                                                                                                                                                                                                                                                                               |                 |                              |                              |                              |                              |                              |                              |
| V <sub>E</sub><br>(L/min)                                                                                                                                                                                                                                                                                                                                                                                                                                                                                                                                                                                                                               | 11.1<br>2.2     | 11.4<br>2.55                 | <b>10.6*</b><br><b>2.5</b>   | <b>10.5‡</b><br><b>2.4</b>   | <b>10.3*</b><br><b>2.5</b>   | <b>10.3‡</b><br><b>2.6</b>   | <b>10.4*</b><br><b>2.6</b>   |
| ETCO <sub>2</sub><br>(mmHg)                                                                                                                                                                                                                                                                                                                                                                                                                                                                                                                                                                                                                             | 39.6<br>2.9     | 39.6<br>3.0                  | 39.4<br>2.9                  | 39.1<br>2.8                  | 39.0<br>2.8                  | 38.9<br>2.8                  | 38.9<br>2.9                  |
| ETO <sub>2</sub><br>(mmHg)                                                                                                                                                                                                                                                                                                                                                                                                                                                                                                                                                                                                                              | 94.1<br>5.9     | <b>137.9†</b><br><b>30.7</b> | <b>254.5†</b><br><b>25.9</b> | <b>307.6†</b><br><b>28.4</b> | <b>349.8†</b><br><b>23.6</b> | <b>376.4†</b><br><b>18.6</b> | <b>384.9†</b><br><b>27.7</b> |
|                                                                                                                                                                                                                                                                                                                                                                                                                                                                                                                                                                                                                                                         |                 |                              |                              |                              |                              |                              |                              |
| <b><u>Cardiovascular</u></b>                                                                                                                                                                                                                                                                                                                                                                                                                                                                                                                                                                                                                            |                 |                              |                              |                              |                              |                              |                              |
| MAP<br>(mmHg)                                                                                                                                                                                                                                                                                                                                                                                                                                                                                                                                                                                                                                           | 91<br>10        | 91<br>11                     | 92<br>12                     | 91<br>11                     | 90<br>11                     | 89<br>11                     | 89<br>12                     |
| CO<br>(L/min)                                                                                                                                                                                                                                                                                                                                                                                                                                                                                                                                                                                                                                           | 5.5<br>1.0      | 5.5<br>0.9                   | 5.5<br>0.9                   | 5.5<br>0.9                   | 5.5<br>0.9                   | 5.4<br>1.0                   | <b>5.3*</b><br><b>1.0</b>    |
| HR<br>(bpm)                                                                                                                                                                                                                                                                                                                                                                                                                                                                                                                                                                                                                                             | 69<br>11        | 69<br>12                     | 69<br>11                     | 68<br>12                     | 68<br>12                     | 68<br>11                     | <b>67*</b><br><b>11</b>      |
| SV<br>(mL)                                                                                                                                                                                                                                                                                                                                                                                                                                                                                                                                                                                                                                              | 80<br>13        | 80<br>13                     | 79<br>12                     | 80<br>12                     | 80<br>14                     | 80<br>13                     | 80<br>12                     |
| SVR<br>(dynes/cm <sup>5</sup> )                                                                                                                                                                                                                                                                                                                                                                                                                                                                                                                                                                                                                         | 1370<br>245     | 1355<br>230                  | 1381<br>243                  | 1364<br>245                  | 1349<br>236                  | 1356<br>238                  | 1382<br>254                  |
| <p>Data are reported as mean ± standard deviation (below). Cardiorespiratory responses to hyperoxia were compared using a 2-factor mixed-effects model: [Group: Control vs. Patient] x [Gas (repeated measure): Normoxia vs Hyperoxia]] and Bonferroni post-hoc analysis. *p&lt;0.05; ‡p&lt;0.01; †p&lt;0.001 represent values significantly different from normoxic baseline. Abbr: HC, healthy controls; V<sub>E</sub>, minute ventilation; ETCO<sub>2</sub>, end-tidal carbon dioxide; ETO<sub>2</sub>, end-tidal oxygen; MAP, mean arterial pressure; CO, cardiac output; HR, heart rate; SV, stroke volume; SVR, systemic vascular resistance.</p> |                 |                              |                              |                              |                              |                              |                              |

**Supplemental Table 5.** Supine cardiorespiratory responses to hyperoxia in patients with POTS (n=25)

|                                                                                                                                                                                                                                                                                                                                                                                                                                                                                                                                                                                                                                                                                    | <u>Normoxia</u> | <u>Hyperoxia</u>             |                              |                              |                              |                              |                              |
|------------------------------------------------------------------------------------------------------------------------------------------------------------------------------------------------------------------------------------------------------------------------------------------------------------------------------------------------------------------------------------------------------------------------------------------------------------------------------------------------------------------------------------------------------------------------------------------------------------------------------------------------------------------------------------|-----------------|------------------------------|------------------------------|------------------------------|------------------------------|------------------------------|------------------------------|
|                                                                                                                                                                                                                                                                                                                                                                                                                                                                                                                                                                                                                                                                                    | <b>Baseline</b> | <b>0-5 sec</b>               | <b>6-10 sec</b>              | <b>11-15 sec</b>             | <b>16-20 sec</b>             | <b>21-25 sec</b>             | <b>26-30 sec</b>             |
| <b><u>Respiratory</u></b>                                                                                                                                                                                                                                                                                                                                                                                                                                                                                                                                                                                                                                                          |                 |                              |                              |                              |                              |                              |                              |
| V <sub>E</sub><br>(L/min)                                                                                                                                                                                                                                                                                                                                                                                                                                                                                                                                                                                                                                                          | 10.3<br>2.3     | 10.5<br>2.6                  | 10.4<br>2.4                  | 9.9<br>2.4                   | <b>9.7*</b><br><b>2.3</b>    | <b>9.4†</b><br><b>2.1</b>    | <b>9.5†</b><br><b>2.3</b>    |
| ETCO <sub>2</sub><br>(mmHg)                                                                                                                                                                                                                                                                                                                                                                                                                                                                                                                                                                                                                                                        | 38.2<br>3.6     | 38.1<br>3.8                  | 37.9<br>3.7                  | 37.8<br>3.8                  | 37.6<br>3.7                  | 37.6<br>3.7                  | 37.5<br>3.6                  |
| ETO <sub>2</sub><br>(mmHg)                                                                                                                                                                                                                                                                                                                                                                                                                                                                                                                                                                                                                                                         | 94.3<br>8.9     | <b>124.7†</b><br><b>20.8</b> | <b>232.9†</b><br><b>37.6</b> | <b>289.6†</b><br><b>38.5</b> | <b>329.0†</b><br><b>39.7</b> | <b>356.5†</b><br><b>37.8</b> | <b>371.3†</b><br><b>36.7</b> |
|                                                                                                                                                                                                                                                                                                                                                                                                                                                                                                                                                                                                                                                                                    |                 |                              |                              |                              |                              |                              |                              |
| <b><u>Cardiovascular</u></b>                                                                                                                                                                                                                                                                                                                                                                                                                                                                                                                                                                                                                                                       |                 |                              |                              |                              |                              |                              |                              |
| MAP<br>(mmHg)                                                                                                                                                                                                                                                                                                                                                                                                                                                                                                                                                                                                                                                                      | 90<br>13        | 90<br>13                     | 89<br>13                     | <b>89*</b><br><b>13</b>      | <b>88†</b><br><b>12</b>      | <b>88†</b><br><b>12</b>      | <b>88†</b><br><b>12</b>      |
| CO<br>(L/min)                                                                                                                                                                                                                                                                                                                                                                                                                                                                                                                                                                                                                                                                      | 5.7<br>1.1      | 5.7<br>1.1                   | 5.7<br>1.1                   | 5.7<br>1.1                   | 5.7<br>1.1                   | 5.6<br>1.1                   | 5.6<br>1.1                   |
| HR<br>(bpm)                                                                                                                                                                                                                                                                                                                                                                                                                                                                                                                                                                                                                                                                        | 70<br>12        | 70<br>12                     | 70<br>13                     | 70<br>12                     | 70<br>12                     | <b>69‡</b><br><b>13</b>      | <b>69‡</b><br><b>13</b>      |
| SV<br>(mL)                                                                                                                                                                                                                                                                                                                                                                                                                                                                                                                                                                                                                                                                         | 81<br>14        | 81<br>14                     | 81<br>14                     | 81<br>14                     | 81<br>15                     | <b>82*</b><br><b>15</b>      | <b>82*</b><br><b>15</b>      |
| SVR<br>(dynes/cm <sup>5</sup> )                                                                                                                                                                                                                                                                                                                                                                                                                                                                                                                                                                                                                                                    | 1319<br>330     | 1312<br>326                  | 1314<br>330                  | 1299<br>312                  | <b>1296*</b><br><b>320</b>   | 1308<br>320                  | 1312<br>332                  |
| <p>Data are reported as mean ± standard deviation (below). Cardiorespiratory responses to hyperoxia were compared using a 2-factor mixed-effects model: [Group: Control vs. Patient] x [Gas (repeated measure): Normoxia vs Hyperoxia]] and Bonferroni post-hoc analysis. *p&lt;0.05; ‡p&lt;0.01; †p&lt;0.001 represent values significantly different from normoxic baseline. Abbr: POTS, postural orthostatic tachycardia syndrome; V<sub>E</sub>, minute ventilation; ETCO<sub>2</sub>, end-tidal carbon dioxide; ETO<sub>2</sub>, end-tidal oxygen; MAP, mean arterial pressure; CO, cardiac output; HR, heart rate; SV, stroke volume; SVR, systemic vascular resistance.</p> |                 |                              |                              |                              |                              |                              |                              |

**Supplemental Table 6.** Respiratory and sympathetic nerve activity at baseline in rats with (intact) and without (denervated) peripheral chemoreceptor and baroreceptor afferents.

|                                                                                                                                                                                                                                                                                                                                                | <b>Baseline</b>                |                                |          |
|------------------------------------------------------------------------------------------------------------------------------------------------------------------------------------------------------------------------------------------------------------------------------------------------------------------------------------------------|--------------------------------|--------------------------------|----------|
|                                                                                                                                                                                                                                                                                                                                                | <u>Intact (n=5)</u>            | <u>Denervated (n=5)</u>        | <u>P</u> |
| Pressure (mmHg)                                                                                                                                                                                                                                                                                                                                | 90±0<br>90 (90, 90)            | 90±0<br>90 (90, 90)            | >0.99    |
| <b>Respiratory (phrenic) nerve activity</b>                                                                                                                                                                                                                                                                                                    |                                |                                |          |
| Total nerve activity (a.u.)                                                                                                                                                                                                                                                                                                                    | 51±29<br>37 (30, 79)           | 62±42<br>60 (29, 69)           | >0.99    |
| Neural tidal volume (a.u.)                                                                                                                                                                                                                                                                                                                     | 2.3±1.2<br>2.1 (1.3, 3.5)      | 2.7±1.5<br>2.6 (1.6, 3.6)      | 0.84     |
| Neural frequency (burst/min)                                                                                                                                                                                                                                                                                                                   | 22±2<br>22 (21 - 23)           | 22±5<br>23 (19, 26)            | 0.69     |
| Inspiratory time (s)                                                                                                                                                                                                                                                                                                                           | 0.9±0.2<br>0.8 (0.8, 0.9)      | 1.0±0.1<br>1.0 (0.9, 1.0)      | 0.22     |
| Expiratory time (s)                                                                                                                                                                                                                                                                                                                            | 1.9±0.4<br>1.9 (1.8, 2.0)      | 1.8±0.7<br>1.4 (1.2, 2.4)      | 0.69     |
| Inspiratory: Expiratory time ratio                                                                                                                                                                                                                                                                                                             | 0.51±0.24<br>0.44 (0.39, 0.45) | 0.68±0.30<br>0.85 (0.38, 0.87) | 0.84     |
| Eupneic index                                                                                                                                                                                                                                                                                                                                  | 0.69±0.03<br>0.69 (0.67, 0.72) | 0.69±0.03<br>0.70 (0.67, 0.71) | 0.69     |
| <b>Sympathetic (splanchnic) nerve activity</b>                                                                                                                                                                                                                                                                                                 |                                |                                |          |
| Total across respiratory cycle (a.u.)                                                                                                                                                                                                                                                                                                          | 1065±1121<br>453 (341, 1440)   | 1154±479<br>1029 (1021, 1144)  | 0.55     |
| Inspiratory phase (a.u.)                                                                                                                                                                                                                                                                                                                       | 981±1087<br>465 (268, 1300)    | 1064±370<br>481 (953, 1089)    | 0.55     |
| Expiratory phase (a.u.)                                                                                                                                                                                                                                                                                                                        | 1134±1186<br>1059 (375, 1541)  | 1261±532<br>1213 (1017, 1269)  | 0.55     |
| Data are reported as mean ± standard deviation and the median (25 <sup>th</sup> , 75 <sup>th</sup> percentiles) below. Baseline group differences between preparations with intact (n=5) and denervated (n=5) peripheral chemoreceptor and baroreceptor afferents were compared using a Mann-Whitney two-tailed t-test. a.u., arbitrary units. |                                |                                |          |

**Supplemental Table 7.** Respiratory and sympathetic nerve activity in response to low and high perfusion in rats with (intact) and without (denervated) peripheral chemoreceptor and baroreceptor afferents.

|                                                                                                                                                                                                                                                                                                                                                                                                                                                                                                                  | <b>Response to Low Pressure</b>                  |                                                  |          | <b>Response to High Pressure</b>                      |                                                  |          |
|------------------------------------------------------------------------------------------------------------------------------------------------------------------------------------------------------------------------------------------------------------------------------------------------------------------------------------------------------------------------------------------------------------------------------------------------------------------------------------------------------------------|--------------------------------------------------|--------------------------------------------------|----------|-------------------------------------------------------|--------------------------------------------------|----------|
|                                                                                                                                                                                                                                                                                                                                                                                                                                                                                                                  | <u>Intact</u><br>(n=5)                           | <u>Denervated</u><br>(n=5)                       | <i>P</i> | <u>Intact</u><br>(n=5)                                | <u>Denervated</u><br>(n=5)                       | <i>P</i> |
| Pressure ( $\Delta$ mmHg)                                                                                                                                                                                                                                                                                                                                                                                                                                                                                        | <b>-26<math>\pm</math>3<math>\ddagger</math></b> | <b>-28<math>\pm</math>3<math>\ddagger</math></b> | 0.27     | <b>27<math>\pm</math>3<math>\ddagger</math></b>       | <b>25<math>\pm</math>3<math>\ddagger</math></b>  | 0.50     |
| <b>Respiratory (phrenic) nerve activity</b>                                                                                                                                                                                                                                                                                                                                                                                                                                                                      |                                                  |                                                  |          |                                                       |                                                  |          |
| Total nerve activity (%)                                                                                                                                                                                                                                                                                                                                                                                                                                                                                         | <b>17<math>\pm</math>3<math>\ddagger</math></b>  | <b>18<math>\pm</math>6<math>\ddagger</math></b>  | >0.99    | <b>-43<math>\pm</math>9<math>\ddagger</math></b>      | <b>-16<math>\pm</math>9<math>\ddagger</math></b> | <0.001   |
| Neural tidal volume (%)                                                                                                                                                                                                                                                                                                                                                                                                                                                                                          | <b>16<math>\pm</math>4*</b>                      | <b>17<math>\pm</math>11*</b>                     | >0.99    | <b>-17<math>\pm</math>10*</b>                         | -12 $\pm$ 12                                     | >0.99    |
| Neural frequency ( $\Delta$ burst/min)                                                                                                                                                                                                                                                                                                                                                                                                                                                                           | 0 $\pm$ 1                                        | 0 $\pm$ 2                                        | >0.99    | <b>-6<math>\pm</math>1<math>\ddagger</math></b>       | -1 $\pm$ 1                                       | <0.001   |
| Inspiratory time ( $\Delta$ s)                                                                                                                                                                                                                                                                                                                                                                                                                                                                                   | 0.0 $\pm$ 0.1                                    | 0.0 $\pm$ 0.0                                    | 0.58     | 0.1 $\pm$ 0.2                                         | 0.0 $\pm$ 0.0                                    | >0.99    |
| Expiratory time ( $\Delta$ s)                                                                                                                                                                                                                                                                                                                                                                                                                                                                                    | 0.0 $\pm$ 0.0                                    | -0.1 $\pm$ 0.3                                   | >0.99    | <b>1.2<math>\pm</math>0.6<math>\ddagger</math></b>    | 0.0 $\pm$ 0.1                                    | <0.001   |
| Inspiratory: Expiratory time ratio ( $\Delta$ )                                                                                                                                                                                                                                                                                                                                                                                                                                                                  | -0.04 $\pm$ 0.08                                 | 0.06 $\pm$ 0.04                                  | 0.009    | <b>-0.14<math>\pm</math>0.04<math>\ddagger</math></b> | 0.00 $\pm$ 0.05                                  | <0.001   |
| Eupneic index ( $\Delta$ )                                                                                                                                                                                                                                                                                                                                                                                                                                                                                       | -0.01 $\pm$ 0.06                                 | -0.00 $\pm$ 0.01                                 | >0.99    | 0.00 $\pm$ 0.06                                       | 0.04 $\pm$ 0.04                                  | >0.99    |
| <b>Sympathetic (splanchnic) nerve activity</b>                                                                                                                                                                                                                                                                                                                                                                                                                                                                   |                                                  |                                                  |          |                                                       |                                                  |          |
| Total across respiratory cycle (%)                                                                                                                                                                                                                                                                                                                                                                                                                                                                               | <b>30<math>\pm</math>22*</b>                     | <b>38<math>\pm</math>26<math>\ddagger</math></b> | >0.99    | <b>-70<math>\pm</math>15<math>\ddagger</math></b>     | -21 $\pm$ 12                                     | <0.001   |
| Inspiratory phase (%)                                                                                                                                                                                                                                                                                                                                                                                                                                                                                            | <b>42<math>\pm</math>43*</b>                     | <b>43<math>\pm</math>33*</b>                     | >0.99    | <b>-64<math>\pm</math>16<math>\ddagger</math></b>     | -21 $\pm$ 15                                     | 0.028    |
| Expiratory phase (%)                                                                                                                                                                                                                                                                                                                                                                                                                                                                                             | <b>27<math>\pm</math>18*</b>                     | <b>32<math>\pm</math>26*</b>                     | >0.99    | <b>-72<math>\pm</math>15<math>\ddagger</math></b>     | -20 $\pm$ 12                                     | <0.001   |
| Data are reported as mean $\pm$ standard deviation (below). Responses to pressure challenges in preparations with intact (n=5) and denervated (n=5) peripheral chemoreceptor and baroreceptor afferents were compared using a 2-factor mixed-effects model: [Group: Intact vs. Denervated] x [Pressure (repeated measure): Baseline vs. Low Pressure vs. High Pressure] and Bonferroni post-hoc analysis. *p<0.05; $\ddagger$ p<0.01; $\ddagger$ p<0.001 represent values significantly different from baseline. |                                                  |                                                  |          |                                                       |                                                  |          |



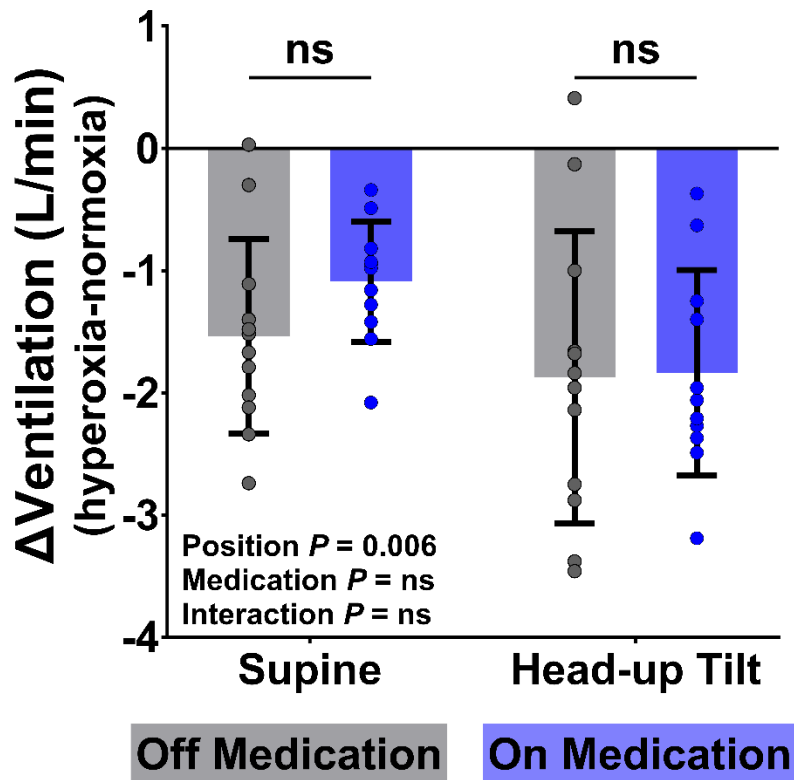

**Supplemental Figure 1.** Interactions between ventilatory response to hyperoxia and medication use. Between group comparisons showed that the magnitude of ventilation inhibition during hyperoxia was not different between patients on medications vs off medication in either position. Data are presented as mean $\pm$ SD. Medication main effect:  $p=0.46$ ; Interaction:  $p=0.25$ . Group differences in ventilation inhibition during hyperoxia were compared using a two-factor mixed-effects model with Bonferroni post-hoc testing correction.
